# Supplementary material
Source: Royal Society of Chemistry journal article supplement (doi:10.1039/d6cc01905f)
Supplement: d6cc01905f1.pdf [file d6cc01905f1.pdf]

## **Plasma Treatment Optimizes Proton, Electron and Mass Transport in Low-Iridium Catalyst Layers for Water Electrolysis**

Yuyang Wang,<sup>†a</sup> Liulin Que,<sup>†a</sup> Qichao Fan,<sup>a</sup> Jian Huang,<sup>\*a</sup> Haokai Xu,<sup>a</sup> Dingding Ye,  
<sup>a</sup> Xianqing Zhu,<sup>a</sup> Jun Li,<sup>\*a</sup> Xun Zhu,<sup>a</sup> and Qiang Liao,<sup>a</sup>

<sup>a</sup>Key Laboratory of Low-grade Energy Utilization Technologies and Systems, National  
Innovation Center for Industry-Education Integration of Energy Storage Technology,  
School of Energy and Power Engineering, Chongqing University, Ministry of  
Education, Chongqing, 400044, China

\* Corresponding author

<sup>a</sup> E-mail: [cquhj@cqu.edu.cn](mailto:cquhj@cqu.edu.cn) (Jian Huang), [lijun@cqu.edu.cn](mailto:lijun@cqu.edu.cn) (Jun Li)

### **CONTENTS**

- Methods
- Supporting Figures

## 1 ■ Methods

### 2 *ACL preparation:*

3 Commercial IrO<sub>2</sub> (99.9 %, Ir<sub>2</sub>O<sub>3</sub>≥84.5%, Alfa Aesar, U.S.) and Pt/C (40wt%, Johnson  
4 Matthey, UK) powders were used as oxygen and hydrogen evolution electrocatalysts,  
5 respectively. Catalyst inks were fabricated by dispersing the IrO<sub>2</sub> or Pt/C powder within  
6 the two PFSA suspension, DI water (18.2 MΩ·cm), and 1-propanol (AR, Chengdu  
7 Kelong Chemical Co., Ltd, China). In the anode catalyst ink, the mass ratio of IrO<sub>2</sub> to  
8 PFSA ionomer is 7:1, and the volume ratio of H<sub>2</sub>O to 1-propanol is 1:2. In the cathode  
9 catalyst ink, the mass ratio of IrO<sub>2</sub> to PFSA ionomer is 5:1, and the volume ratio of H<sub>2</sub>O  
10 to 1-propanol is 1.4:1. The fresh ink was first subjected to ultrasonicate for 20 minutes  
11 and then sprayed onto a Nafion 212 membrane by an ultrasonic spray system (SimCoat,  
12 Sono-Tek Corporation, U.S.), with a pump rate of 0.3 mL·min<sup>-1</sup> and a heating plate  
13 temperature of 90°C. The cathode and anode CL were sprayed sequentially at an  
14 interval of 30 min to ensure complete removal of the solvent from the CL. The final Ir  
15 loadings obtained for the ACL were 0.4 mg·cm<sup>-2</sup>, and the Pt loadings for the cathodic  
16 catalytic layer were also 0.2 mg·cm<sup>-2</sup>. To obtain the P-ACL, the ACL of the prepared  
17 MEA was treated using low-temperature oxygen plasma equipment (Shenzhen  
18 Shenguangda Technology Co., Ltd.) for 10 cycles, with each cycle consisting of a 5-  
19 second plasma exposure followed by a 5-second cooling interval.

20

### 21 *Characterizations*

1 X-ray diffraction (XRD) was conducted by a BRUCKER D8 ADVANCE X-ray  
2 powder diffractometer with monochromatized Cu K $\alpha$  radiation. X-ray photoelectron  
3 spectroscopy (XPS) and ultraviolet photoelectron spectroscopy (UPS) were operated  
4 with Thermo Escalab 250Xi. The scanning electronic microscopy (SEM) images were  
5 obtained by a Hitachi SU8020 electron microscope. AFM in air condition was  
6 conducted at C-AFM and QNM in Air Model with a nitride-coated silicon tip on nitride  
7 cantilever (Dimension; Bruker, Germany). The physicochemical properties of the  
8 ionomer thin films were characterized by Fourier transform infrared spectroscopy  
9 (FTIR, Nicolet 6700, Thermo Fisher Scientific, Waltham, U.S.) over the range of 2000–  
10 400 cm<sup>-1</sup>.

11

#### 12 *Electrochemical test:*

13 A commercial electrolyzer with a 6.8-cm<sup>2</sup> active area (Mainz-PEM04, Mainz  
14 Laboratory Equipment Co., Ltd. Shandong, China) was utilized to evaluate the  
15 PEMWE performance. Titanium-fiber felts (~240- $\mu$ m thickness, 50% porosity, Bekaert  
16 Co., Ltd., Zwevegem, Belgium) were used as PTLs at the cathode and anode sides. A  
17 230- $\mu$ m-thick PTFE film was used as a gasket, and the electrolyzer was assembled  
18 using a torque of 4 Nm (with a M5 bolt). Following the assembly of the electrolyzer,  
19 water is fed through the system for 3 hours to facilitate electrode activation.  
20 Electrochemical tests were performed using an electrochemical workstation equipped  
21 with a potentiostat and booster (VMP-300 & 80A Booster, Bio-Logic, Seyssinet-

1 Pariset, France). All testing procedures were operated with a water flow rate of 10.0  
2 mL·min<sup>-1</sup>. Electrochemical impedance spectra measurements were made in the range  
3 of 0.05 Hz-100 kHz with the current perturbations of ±200 mA to determine the high  
4 frequency resistance (HFR), charge, and mass transport impedance of different MEAs.  
5

#### 6 *AIMD calculations*

7 All AIMD calculations were performed using the Vienna Ab initio Simulation  
8 Package (VASP), employing the projector-augmented wave (PAW) method to describe  
9 the electron-ion interactions. The system consisted of an IrO<sub>2</sub> (110) surface slab model  
10 with adsorbed H<sub>2</sub>O and O<sub>2</sub> molecules, simulated under AIMD conditions to investigate  
11 the water network dynamics. The exchange-correlation functional was treated within  
12 the generalized gradient approximation (GGA) using the Perdew-Burke-Ernzerhof  
13 (PBE) form, unless otherwise specified. The precision was set to Normal (PREC=  
14 Normal) for computational efficiency, with a plane-wave energy cutoff of 400 eV.

15

#### 16 *CFD calculations*

17 In this study, a three-dimensional, multi-physics model was developed using  
18 COMSOL Multiphysics 6.2. The simulations were performed on a workstation  
19 equipped with a six-core, 2.5 GHz Intel processor and 32 GB of RAM. The model  
20 incorporates coupled physical phenomena, including electrochemical reactions, two-  
21 phase flow, heat transfer, water transport, species transport, and hydrogen crossover,

1 by integrating the corresponding modules within the software. The governing equations  
2 were solved using the PARDISO direct solver with a segregated solution approach. A  
3 voltage sweep from 1.2 V to 2.0 V was applied with an increment of 0.05 V. The  
4 computational domain was discretized using a mesh consisting of 790,378 nodes to  
5 ensure solution accuracy while maintaining computational efficiency. Geometry  
6 parameters and other model parameters are listed in Table S1. The boundary condition  
7 is listed in Table S2.

8 Model assumptions:

- 9 (1) The PEMWE cell operate at steady state;
- 10 (2) The gas species are incompressible ideal gas;
- 11 (3) Porous media domains such as the membrane, PTLs, and CLs are considered  
12 homogeneous and isotropic;
- 13 (4) The flow is laminar due to the low velocity;
- 14 (5) The hydrogen generated is first in the dissolved state;
- 15 (6) OER and HER obey Butler–Volmer kinetics.

16 The model incorporates ten conservation equations to describe the processes in  
17 PEMWE: (i–iv) mass conservation and momentum conservation for liquid and gas  
18 phases, (v) liquid water saturation, (vi) species transport of mix gases, (vii) electronic  
19 charge, (viii) protonic charge, (ix) thermal transfer, (x) water transport in MEAs, and  
20 (xi) hydrogen crossover.

21 (i) Liquid-water mass conservation:

1 
$$\nabla \cdot (\rho_l u_l) = S_l \quad (S1)$$

2 where  $\rho_l$  and  $u_l$  are the density and velocity of liquid water, respectively.  $S_l$  refers to  
3 the mass source term, which results from water consumption on the CLs.

4 (ii) Liquid-water momentum conservation:

5 
$$\frac{\rho_l}{\varepsilon^{eff}} (u_l \cdot \nabla) \frac{u_l}{\varepsilon^{eff}} = \nabla \cdot \begin{bmatrix} -p_l I + \frac{\mu_l}{\varepsilon^{eff}} (\nabla u_l + (\nabla u_l)^T) \\ -\frac{2}{3} \frac{\mu_l}{\varepsilon^{eff}} (\nabla \cdot u_l) I \end{bmatrix} - \left\{ \frac{\mu_l}{k_0 k_{rl}} + \frac{S_l}{(\varepsilon^{eff})^2} \right\} u_l \quad (S2)$$

6 The effective porosity is denoted by  $\varepsilon^{eff}$ , while  $p_l$  represents the liquid water pressure,  
7 the dynamic viscosity of liquid water is given as  $\mu_l$ , and  $k_0$  denotes the absolute  
8 permeability of the liquid phase, The relative permeability  $k_{rl}$  is expressed as the cube  
9 of the liquid water saturation  $s$ , i.e.,  $k_{rl}=s^3$ .

10 (iii) Gas-phase mass conservation:

11 
$$\nabla \cdot (\rho_g u_g) = S_g \quad (S3)$$

12 where  $\rho_g$  and  $u_g$  denote the density and velocity of the gas, respectively.  $S_g$  represents  
13 the mass source term, which is caused by the gas generated on the CLs.

14 (iv) Gas-phase momentum conservation:

15 
$$u_g = -\frac{k_0 k_{rg}}{\mu_g} \nabla p_g \quad (S4)$$

16 where  $p_g$  and  $\mu_g$  are the pressure and dynamic viscosity of the gas, respectively, and  $k_0$   
17 is the absolute permeability of the gas. This study defines the relative permeability of  
18 the gas phase as  $k_{rg} = (1 - s)^3$ .

19 (v) Liquid water saturation:

20 The capillary pressure in the porous region is:

$$p_c = p_l - p_g = \sigma \cos \theta \left( \frac{\varepsilon}{K_0} \right)^{0.5} J(s) \quad (S5)$$

$$J(s) = \begin{cases} 1.417(1-s) - 2.120(1-s)^2 + 1.263(1-s)^3, & 0^\circ < \theta \leq 90^\circ \\ 1.417(1-s) - 2.120s^2 + 1.263s^3, & 90^\circ < \theta \leq 180^\circ \end{cases} \quad (S6)$$

After rearranging Eqs. (S1), (S3), (S4) and (S5-S6), the conservation equation of liquid water saturation can be rewritten as:

$$\nabla \cdot \left( -\rho_g D_c \nabla s + \rho_g \frac{k_{rg} \mu_l}{k_{rl} \mu_g} u_l \right) = S_g \quad (S7)$$

Here,  $D_c$  is the capillary diffusion coefficient, which is expressed as:

$$D_c = \frac{\sigma \cos \theta}{\mu_g} k_{rg} (\varepsilon k_0)^{0.5} \frac{dJ(s)}{ds} \quad (S8)$$

(vi) Species transport of mix gases:

$$\nabla \cdot \left( \rho_g D_{ij}^{eff} \nabla w_i - \rho_g w_i \sum_j D_{ij}^{eff} \frac{\nabla w_j M_n}{M_j} \right) + \rho_g (u_g \cdot \nabla) w_i = S_{c,i} \quad (S9)$$

$$D_{H_2, O_2/H_2}^{eff} = \begin{cases} 0.36 \times 10^{-4} \left( \frac{T}{T^{ref}} \right)^{1.5} \left( \frac{p_g^{ref}}{p_g} \right) k_{rg} \text{ (anode)} \\ 1.24 \times 10^{-4} \left( \frac{T}{T^{ref}} \right)^{1.5} \left( \frac{p_g^{ref}}{p_g} \right) k_{rg} \text{ (cathode)} \end{cases} \quad (S10)$$

In the PEMWE model, gas-phase species transport is governed by a multicomponent diffusion equation based on Fick's law. Here,  $D_{ij}^{eff}$  represent the effective gas diffusion coefficient between species  $i$  and  $j$ , and  $w_i$  denotes the mass fraction of gas species  $i$ .

(vii) Electronic charge:

$$\nabla \cdot (-\sigma_e^{eff} \nabla \phi_e) = S_e \quad (S11)$$

(viii) Protonic charge:

$$\nabla \cdot (\sigma_p \nabla \phi_p) = S_p \quad (S12)$$

1 In this context, the subscripts  $e$  and  $p$  denote electrons and proton transport,  
 2 respectively. The variables  $S_e$  and  $S_p$  represent general source terms, while  $\phi_e$  and  $\phi_p$   
 3 correspond to the solid electrode potential and the liquid electrolyte potential,  
 4 respectively.  $\sigma_e^{eff}$  indicates the effective conductivity of solid phase. The effective  
 5 conductivity of electrolyte,  $\sigma_p$ , is dependent on both dissolved water content and the  
 6 operating temperature of the cell:

$$\sigma_p = (0.5139\lambda - 0.326) \exp\left\{1268\left(\frac{1}{T^{ref}} - \frac{1}{T}\right)\right\} \quad (S13)$$

7 where  $\lambda$  is the water content of the membrane, the reference temperature of  $T^{ref}$  is  
 8 353.15K.

10 (ix) Thermal transfer:

$$\nabla(\rho^{eff} C_p^{eff} uT) = \nabla \cdot (k^{eff} T) + S_T \quad (S14)$$

11 where  $\rho^{eff}$ ,  $C_p^{eff}$  and  $k^{eff}$  represent the effective density, specific heat capacity and  
 12 effective thermal conductivity, respectively.  $S_T$  denotes the energy source term, which  
 13 includes contributions from irreversible heat, entropic heat and ohmic heat sources.  
 14

15 (x) Water transport in MEAs:

$$\nabla \cdot \left\{ \begin{array}{l} -\frac{D_\lambda^{eff}}{V_m} \nabla \lambda \\ \text{diffusion} \end{array} + \frac{n_d^w}{F} j_p + \frac{\lambda K_{l,pem} p_{l,apem} - p_{l,cpem}}{V_m \mu_l \delta_{pem}} \right\} = S_\lambda \quad (S15)$$

$$D_\lambda^{eff} = \varepsilon_{ion}^{1.5} \frac{3.842\lambda^3 - 32.03\lambda^2 + 67.74\lambda}{\lambda^3 - 2.115\lambda^2 - 33.013\lambda + 103.37} \times 10^{-10} \exp\left[\frac{E_\lambda}{R} \left(\frac{1}{T^{ref}} - \frac{1}{T}\right)\right] \quad (S16)$$

17 where  $\varepsilon_{ion}$  is the volume of ionomer, which is discussed in the next section.  $V_m$  is the  
 18 molar volume of the electrolyte, while  $E_\lambda$  is the activation energy for water diffusion.

19  $n_d^w$  and  $j_p$  are electro-osmotic drag coefficient and protonic flux.

1 (xi) Hydrogen crossover:

2 Hydrogen generated at the cathode catalytic layer (CCL) first exists in a dissolved,  
 3 supersaturated state. Once its concentration exceeds the thermodynamic equilibrium, a  
 4 portion precipitates to form gaseous bubbles, while the remaining dissolved hydrogen  
 5 permeates across the PEM toward the anode. The total hydrogen transported via these  
 6 two pathways—bubble formation and membrane crossover—equals the total amount  
 7 of hydrogen electrochemically produced at the cathode:

$$8 \quad \frac{i_{v,c}}{2F} = S_{bub} + S_{per} \quad (S17)$$

$$9 \quad S_{bub} = k_L(c_{H_2}^d - c_{H_2}^0) \quad (S18)$$

$$10 \quad c_{H_2}^0 = \frac{p_{H_2}}{\sigma_{H_2}} \quad (S19)$$

11 where  $k_L$  denotes the mass transport coefficient,  $c_{H_2}^d$ (mol m<sup>-3</sup>) the local dissolved  
 12 hydrogen concentration, and  $c_{H_2}^{Henry}$  (mol m<sup>-3</sup>) the theoretical saturation concentration.  
 13 The Henry coefficient,  $\sigma_{H_2}$ (Pa mol<sup>-1</sup> cm<sup>3</sup>), which relates the dissolved concentration to  
 14 the hydrogen partial pressure  $p_{H_2}$ (Pa), can be estimated for temperatures within 0 to  
 15 100°C and pressure up to 1 MPa by the following expression:

$$16 \quad \sigma_{H_2} = \begin{cases} 7.9 \times 10^6 \exp\left(-\frac{545}{T}\right) \times (1 + 0.000071 p_{H_2}^3) & 0 \sim 45^\circ\text{C} \\ 8.34 \times 10^5 \exp\left(\frac{170}{T}\right) \times (1 + 0.000071 p_{H_2}^3) & 45 \sim 100^\circ\text{C} \end{cases} \quad (S20)$$

17  $S_{per}$  is described by:

$$18 \quad S_{per} = -\nabla \cdot (\varepsilon_{im} D_{H_2,im}^{eff} \nabla c_{H_2}^d) + \nabla \cdot \left( \varepsilon_{im} \frac{n_d^w}{F c_{H_2}^d} \rightarrow c_{H_2}^d \right) + \nabla \cdot \left( \varepsilon_{pore} \vec{u}_l \cdot c_{H_2}^d + \frac{K_m \Delta p}{\mu_l d_{MEM}} \cdot c_{H_2}^d \right) \quad (S21)$$

1 Here,  $K_m$  represents the permeability of the membrane,  $\mu_t$  is the dynamic viscosity of  
 2 the solvent and  $\Delta p$  denotes the absolute pressure difference across the interface between  
 3 the membrane and CLs. The electro-osmotic drag coefficient of water in the electrolyte  
 4 is expressed as  $n_d^w = 2.5\lambda/22$ , where  $\lambda$  is the water content. Additionally,  $c_{H_2O}$  refers to the  
 5 molar concentration of water.

$$D_{H_2,im}^{eff} = 7.634 \times 10^{-6} \exp\left(-\frac{2225.4}{T}\right) \frac{f_v}{\tau_m} \quad (S22)$$

6 where  $f_v$  is the volumetric water content in ionomer calculated by  $f_v = \lambda V_w / (V_m + \lambda V_w)$ ,  
 7  $\tau_m$  is the tortuosity of the membrane calculated by  $\tau_m = 1 / (1 - 0.85(1 - f_v))$ .

9 The volumetric reaction rates of the oxygen evolution reaction (OER) and  
 10 hydrogen evolution reaction (HER) in the anode and cathode catalyst layers,  
 11 respectively, were described using modified Butler–Volmer kinetics, accounting for the  
 12 influence of local temperature and reactant concentration on electrochemical activity:

$$R_a = i_{v,a} = s^n a_{v,a} i_{0,a} e^{\left(-\frac{E_{exc}}{R} \left(\frac{1}{T} - \frac{1}{T^{ref}}\right)\right)} \left\{ \exp\left(\frac{\alpha_a F \eta}{RT}\right) - \exp\left(\frac{-\alpha_c F \eta}{RT}\right) \right\} \quad (S23)$$

$$R_c = i_{v,c} = a_{v,c} i_{0,c} e^{\left(-\frac{E_{exc}}{R} \left(\frac{1}{T} - \frac{1}{T^{ref}}\right)\right)} \left\{ \exp\left(\frac{\alpha_a F \eta}{RT}\right) - \exp\left(\frac{-\alpha_c F \eta}{RT}\right) \right\} \quad (S24)$$

15 In the expressions above, the subscripts  $a$  and  $c$  denote the anode and cathode,  
 16 respectively.  $a_v$ ,  $i_0$  and  $\alpha_{a/c}$  represent the specific active surface area, exchange current  
 17 density and anodic/cathodic charge transfer coefficients, respectively.  $F$  and  $R$  are the  
 18 Faraday and gas constants,  $T$  is the temperature, and  $E_{exc}$  (53.99 kJ/mol) is the activation  
 19 energy for the electrode reaction. The activation overpotential,  $\eta$ , is defined as the  
 20 difference between the ionic potential and the electronic potential:

1 
$$\eta = \phi_e - \phi_p - E_{eq} \quad (S25)$$

2 The equilibrium voltage  $E_{eq}$  on the cathode is equal to zero and the equilibrium  
3 voltage can be calculated by the following equation:

4 
$$E_{eq} = 1.229 - 9.0 \times 10^{-4}(T - 298.15) \quad (S26)$$

5 Other relevant source terms are listed in the Table S3.

6 A general PEMWE model is developed to investigate and predict the influence of  
7 different PTL structures on mass transit and cell performance. The total cell voltage  
8  $V_{cell}$  is composed of four contributions: (i) the Nernst potential,  $V_{Nernst}$ , calculated from  
9 the Nernst equation; (ii) the activation overpotential,  $V_{act}$ ; (iii) the ohmic overpotential,  
10  $V_{Ohm}$ ; and (iv) the mass transport overpotential,  $V_{mass}$ , as expressed in the following  
11 equation:

12 
$$V_{cell} = V_{Nernst} + V_{act} + V_{Ohm} + V_{mass} \quad (S27)$$

13 (i) Nernst voltage:

14 
$$V_{Nernst} = E_{eq} \quad (S28)$$

15 (ii) Activation overpotential:

16 
$$V_{act} = \eta_a + \eta_c = \frac{RT}{\alpha_a F} \operatorname{arcsinh}\left(\frac{i}{2i_{0,a}}\right) + \frac{RT}{\alpha_c F} \operatorname{arcsinh}\left(\frac{i}{2i_{0,c}}\right) \quad (S29)$$

17 (iii) Ohmic overpotential:

18 
$$V_{ohm} = R_{ohm} l \frac{I}{A(1 - \epsilon)^{1.5}} \quad (S30)$$

19 (iv) Mass transport overpotential:

20 The mass transport overpotential comprises two distinct contributions: the  
21 diffusion overpotential  $V_{diff}$  and the bubble-induced overpotential  $V_{bub}$ . The diffusion  
22 overpotential arises from the limitation of reactant transport through the anode and

1 cathode. In contrast, the bubble overpotential is predominantly on the anode side, where  
 2 the accumulation of oxygen bubbles impedes the supply of liquid water to the catalyst  
 3 sites.

$$4 \quad V_{mass} = V_{diff} + V_{bub}$$

$$5 \quad V_{diff} = \frac{RT}{4F} \ln \left( \frac{c_{O_2}}{c_{O_2,0}} \right) + \frac{RT}{2F} \ln \left( \frac{c_{H_2}}{c_{H_2,0}} \right) \quad (S31)$$

$$6 \quad V_{bub} = \frac{RT}{4F} \ln \left( \frac{1}{(1 - s_{O_2, ACL})^{n_s}} \right) \quad (S32)$$

7 The oxygen and hydrogen concentrations at the CLs are denoted by  $c_{O_2}$  and  $c_{H_2}$ ,  
 8 respectively, with  $c_{O_2,0}$  and  $c_{H_2,0}$  representing their corresponding reference  
 9 concentrations. The average oxygen gas saturation at anode catalytic layer is expressed  
 10 as  $s_{O_2, ACL}$ . The exponent  $n_s$ , referred to as the coverage coefficient, reflects the influence  
 11 of gas or water saturation under high current density conditions and is assigned a value  
 12 of 3.

1 ■ **Supporting Figures**

2

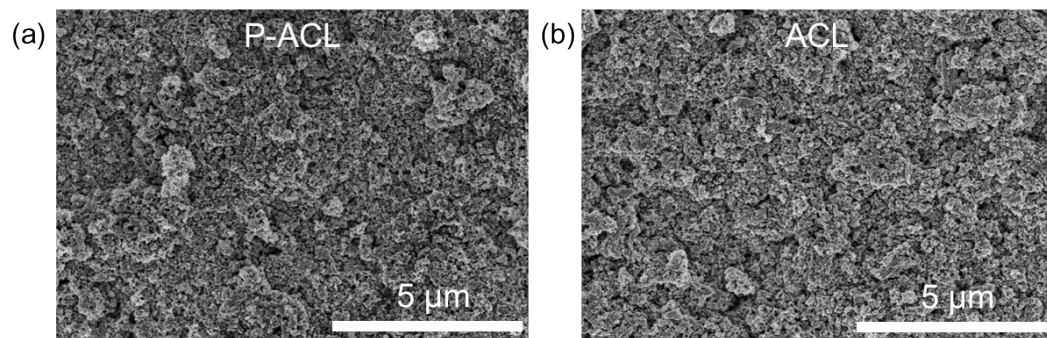

3

4 **Figure S1.** SEM image of P-ACL and ACL surface.

5

6

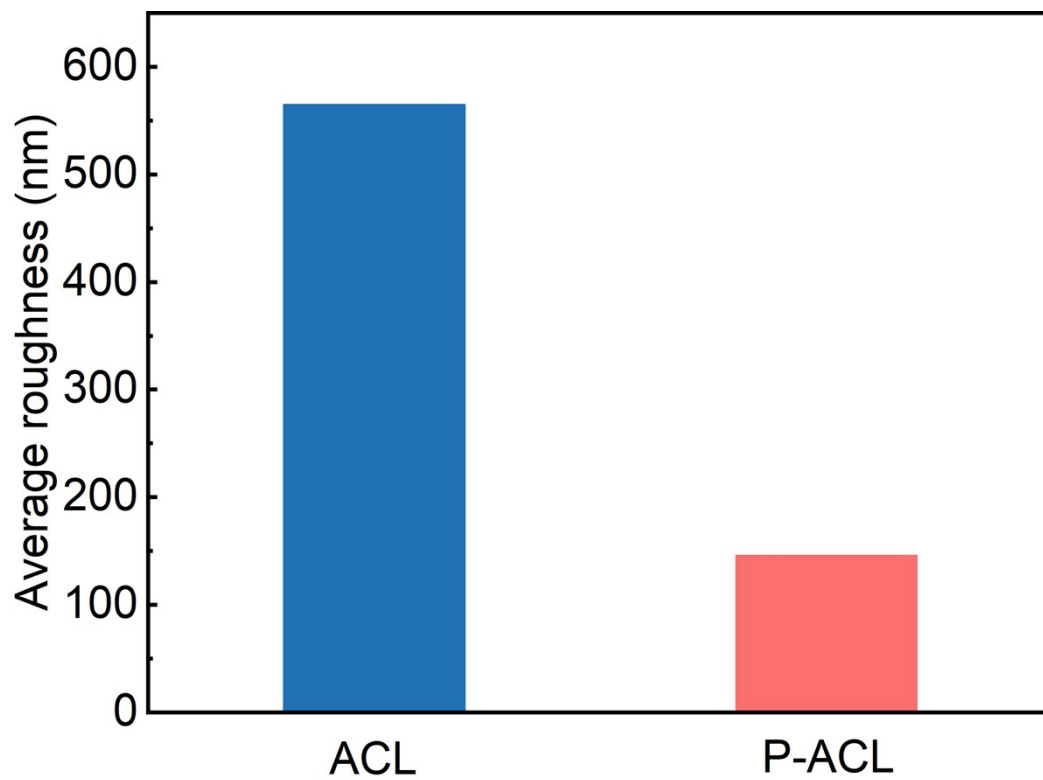

1

2 **Figure S2.** Average roughness of P-ACL and ACL.

3

4

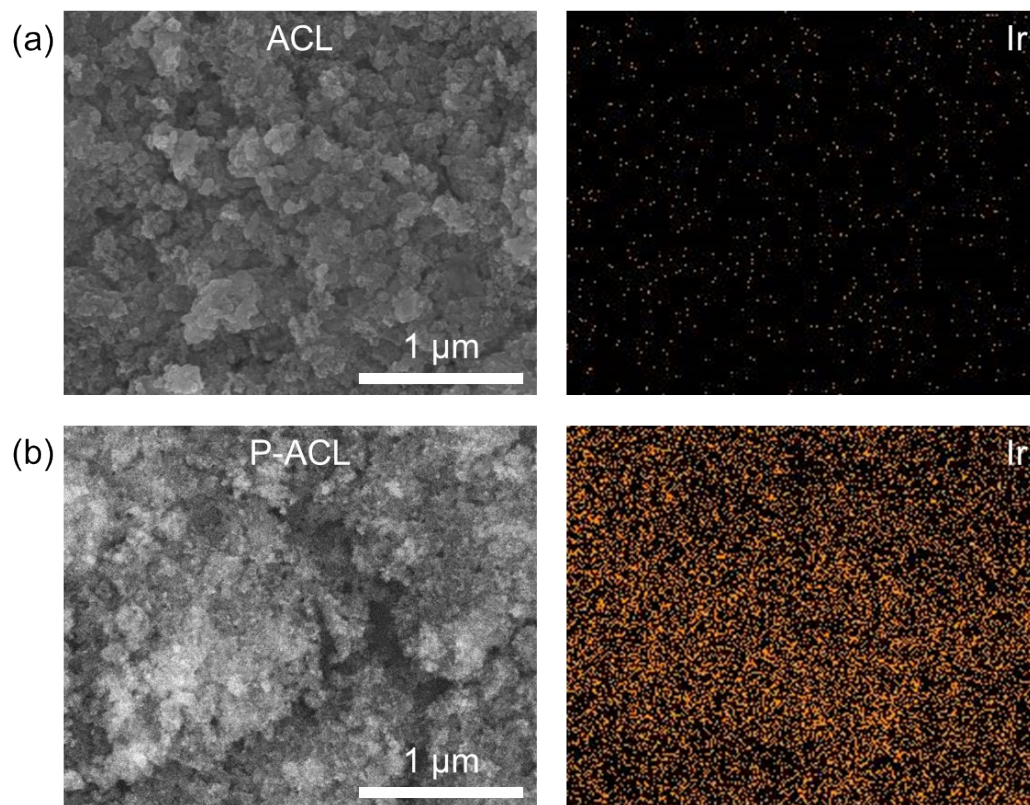

1  
2  
3  
4

**Figure S3.** Average roughness of P-ACL and ACL.

1

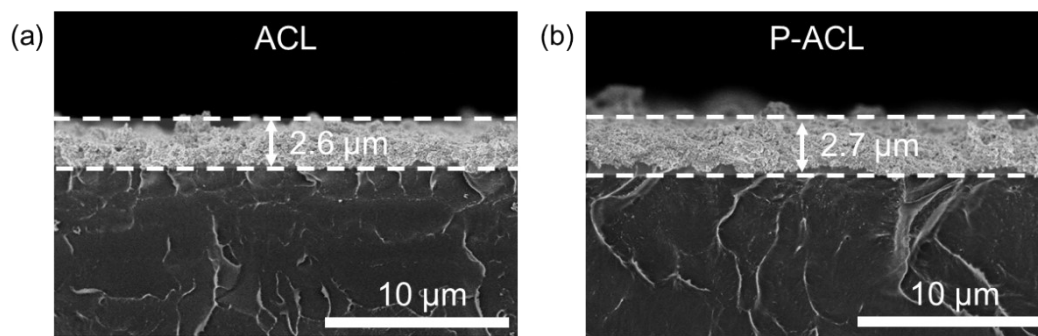

2

3 **Figure S4.** SEM image of P-ACL and ACL cross-section.

4

5

6

1

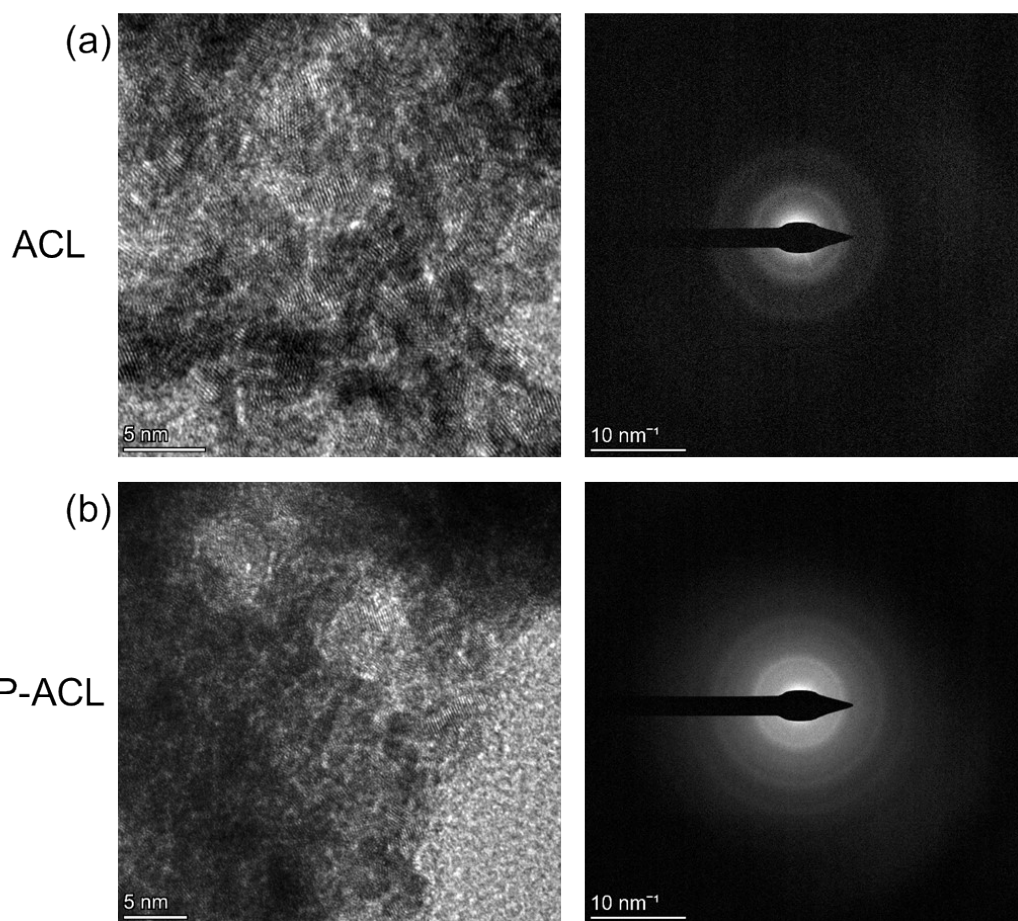

2

3 **Figure S5.** High-resolution transmission electron microscopy (HRTEM) images and  
4 corresponding selected area electron diffraction (SAED) patterns of IrO<sub>2</sub> catalysts in  
5 the ACL and P-ACL.

6

7

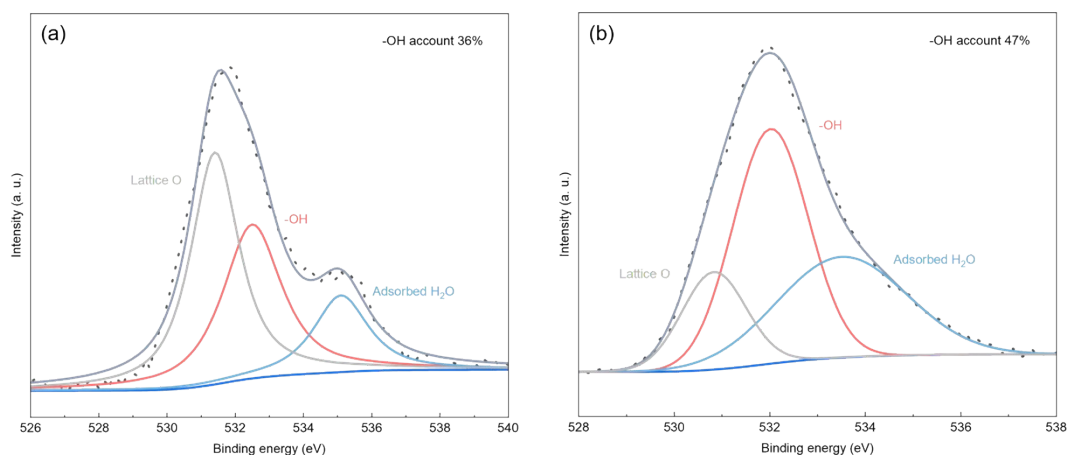

1

2 **Figure S6.** High-resolution XPS O 1s spectra of the anode catalyst layer (a) before  
 3 and (b) after O<sub>2</sub> plasma treatment.

4

5 XPS O 1s spectra of the catalyst layers were deconvoluted into three main  
 6 components: lattice oxygen (~530.5 eV), surface hydroxyl groups (-OH, ~532.0 eV),  
 7 and adsorbed water (~534.5 eV). As shown in Figure S6, the relative content of surface  
 8 -OH groups increased significantly from 36% in the pristine anode catalyst layer to 47%  
 9 after O<sub>2</sub> plasma treatment.

10 This notable increase in surface hydroxyl density plays a critical role in enhancing  
 11 proton transport within the catalyst layer. The introduced -OH groups can act as  
 12 additional proton hopping sites and improve the hydrophilicity of the catalyst surface,  
 13 facilitating the formation of more effective proton-conducting pathways at the catalyst-  
 14 ionomer interface. Consequently, this leads to reduced mass transport resistance and  
 15 improved overall PEMWE performance, particularly under high current densities  
 16 where proton transport becomes more critical.

17 The correlation between elevated surface -OH content and enhanced proton  
 18 conduction is consistent with previous reports on surface-modified electrocatalysts,  
 19 where hydroxyl-rich surfaces promote water dissociation and proton mobility.

20

1

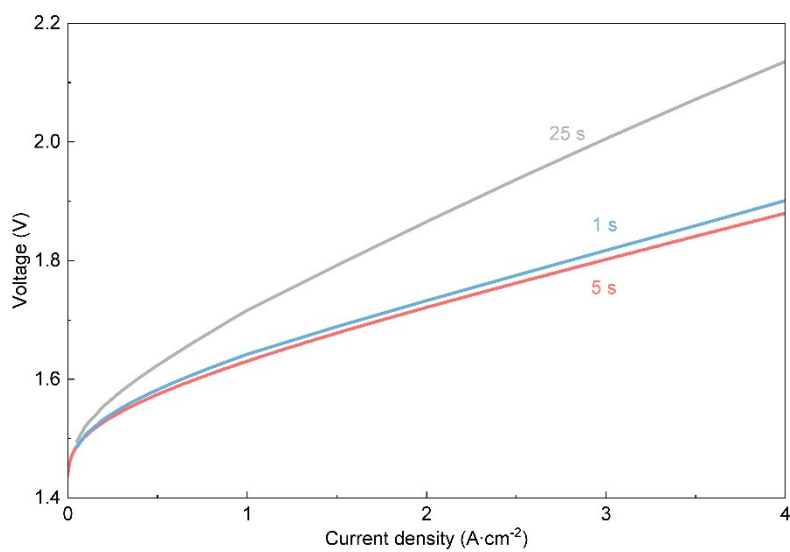

2

3 **Figure S7.** Polarization curves of ACLs treated with different plasma durations.

4

1

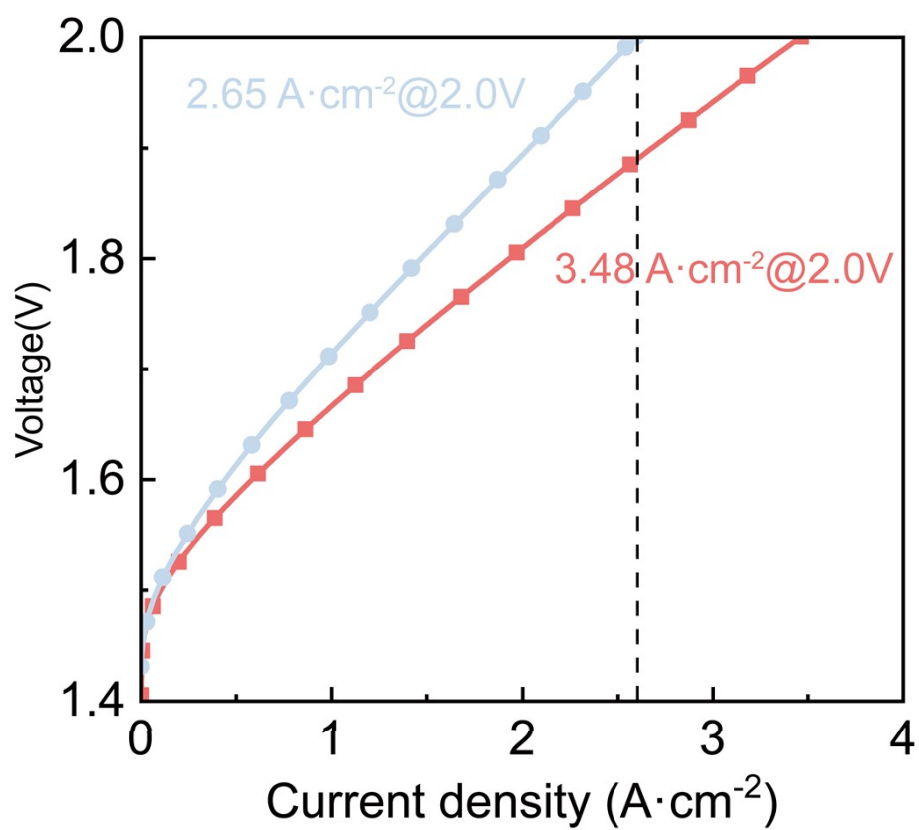

2

3 **Figure S8.** Polarization curves recorded at 70°C with Nafion N115.

4

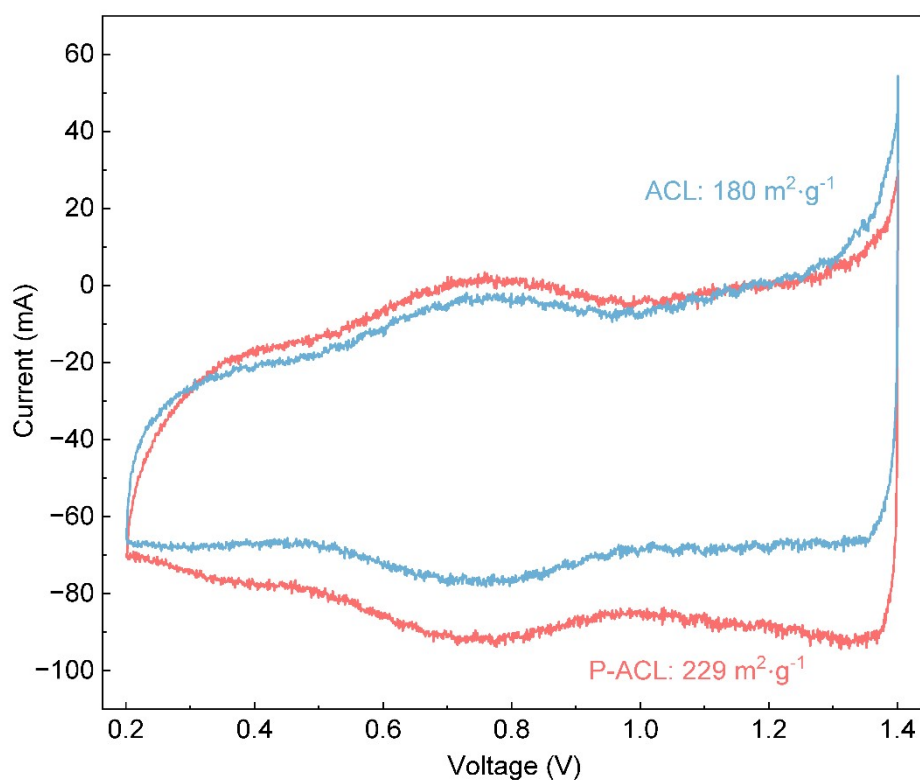

1

2 **Figure S9.** CV curves recorded at 70°C with Nafion N212.

3

1

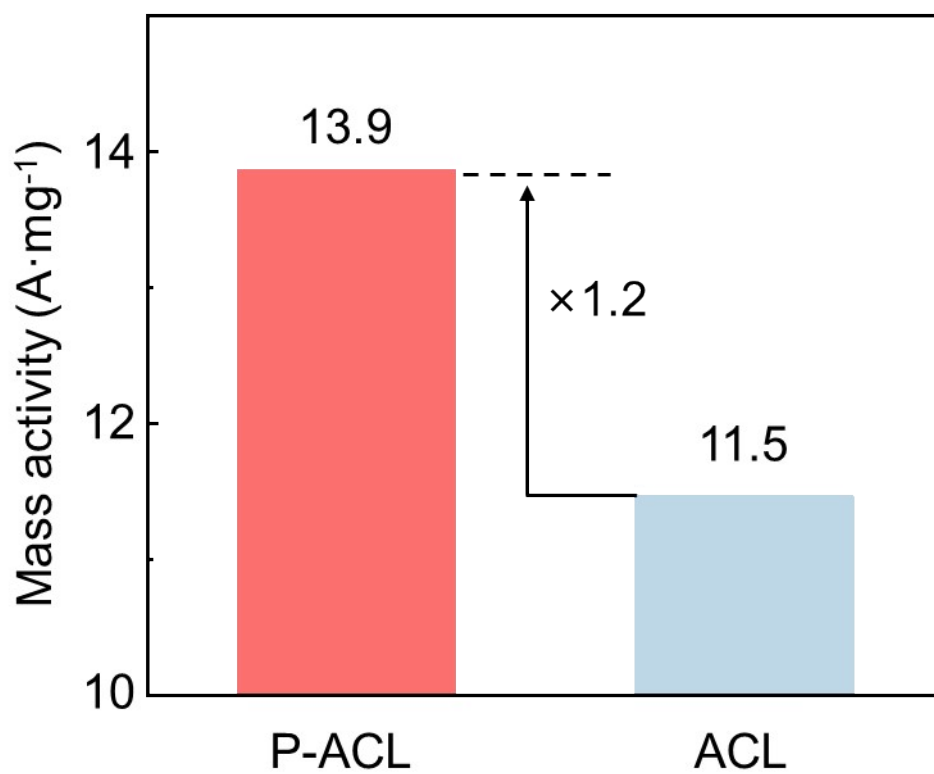

2

3 **Figure S10.** Mass activity of ACL and P-ACL.

4

5

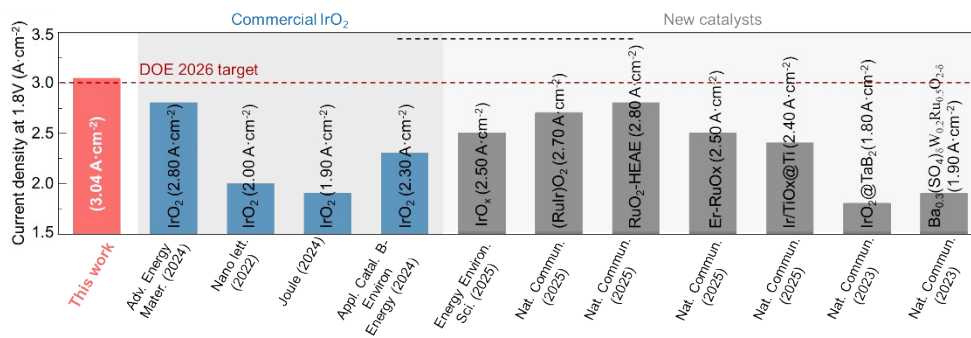

1  
 2 **Figure S11.** Benchmarking of current density achieved at 2.0 V against state-of-the-art  
 3 Ir-based anodes reported in recent literature and commercial IrO<sub>2</sub>.  
 4

1

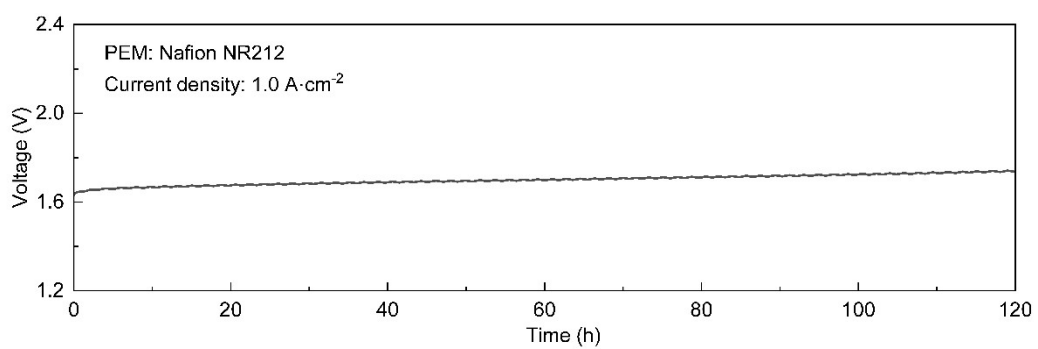

2

3 **Figure S12.** Stability test of PEMWE at 1 A·cm<sup>-2</sup>.

4

5

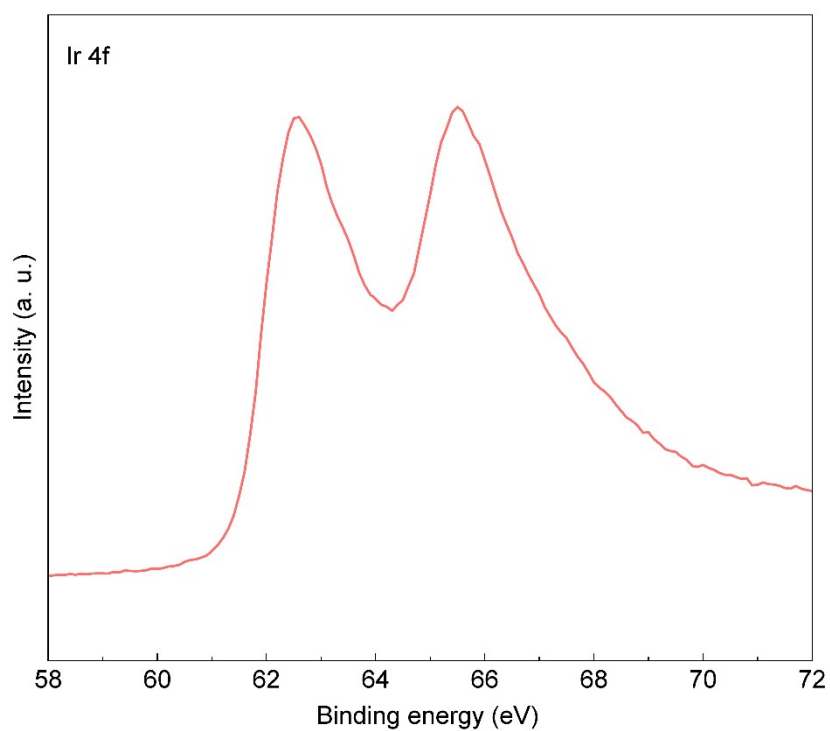

1

2 **Figure S13.** Ir 4f XPS spectrum of the plasma-treated catalyst after the 120-hour  
3 stability test, showing characteristic IrO<sub>2</sub> doublet peaks.

4

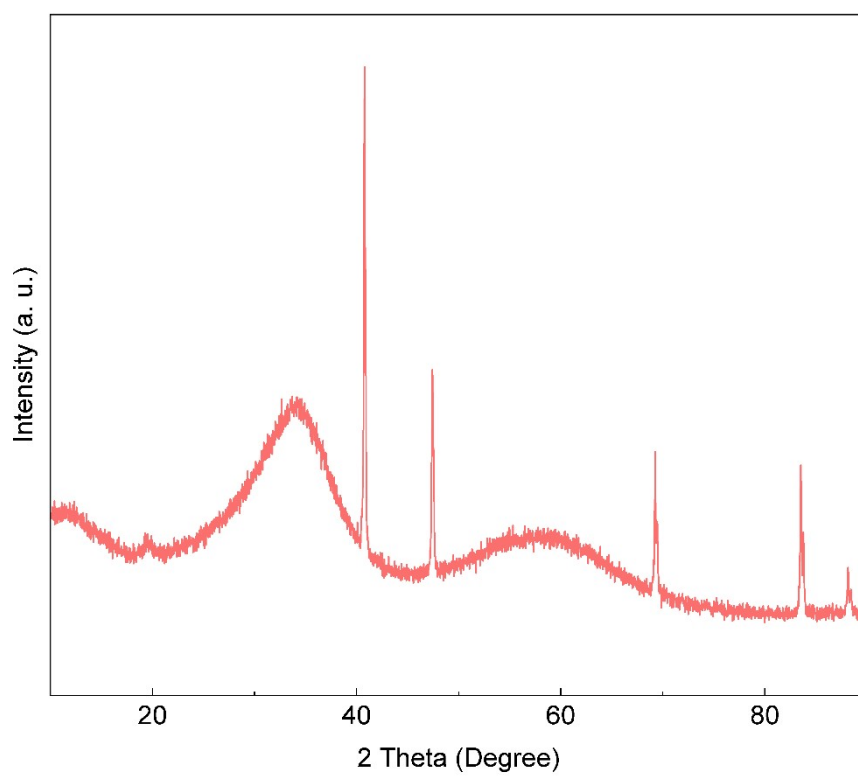

1

2 **Figure S14.** XRD pattern of the O<sub>2</sub> plasma-treated catalyst after the 120-hour stability  
3 test at 1.0 A·cm<sup>-2</sup>.

4

5

1

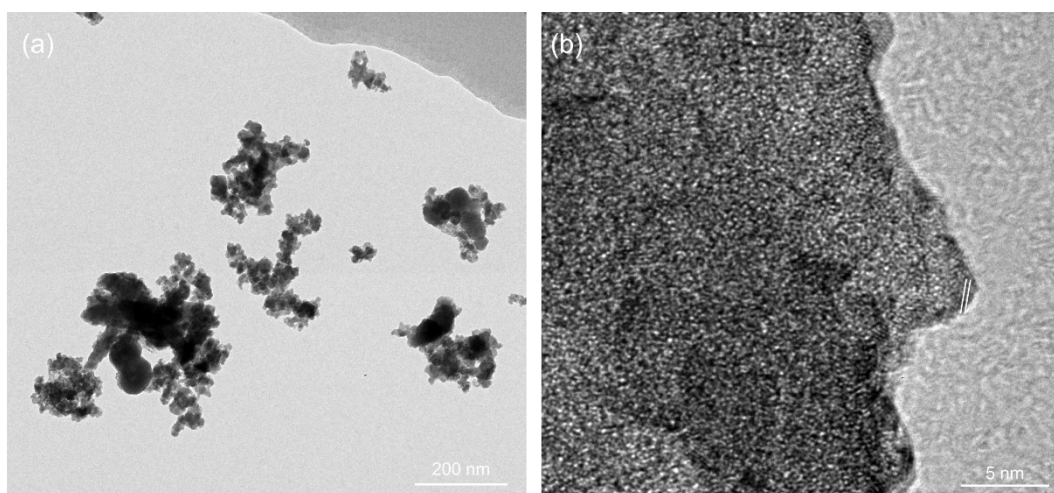

2

3 **Figure S15.** TEM images of the plasma-treated catalyst after the 120-hour stability  
4 test. (a) Low-magnification view and (b) high-resolution TEM image.

5

6

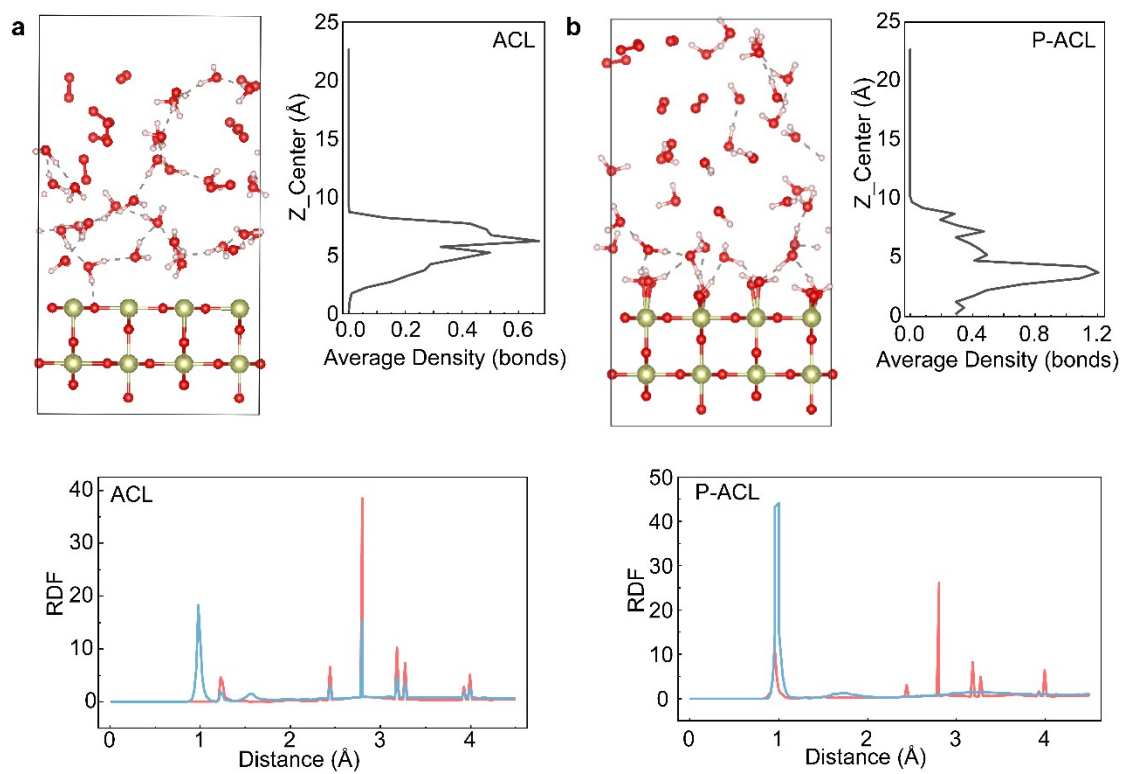

1  
2  
3  
4  
5

**Figure S16.** Microscopic mechanism of mass transport. (a) AIMD simulation model and average H-bonds density, (b) pair distribution function.

1

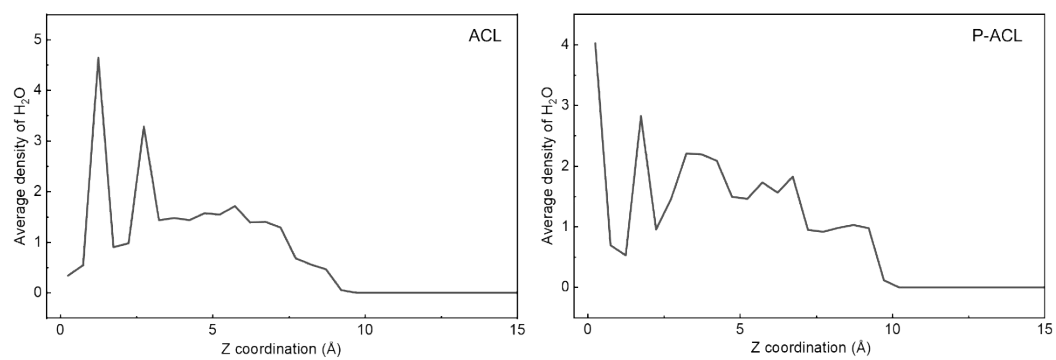

2

3 **Figure S17.** Average density of H<sub>2</sub>O in the surface of ACL and P-ACL

4

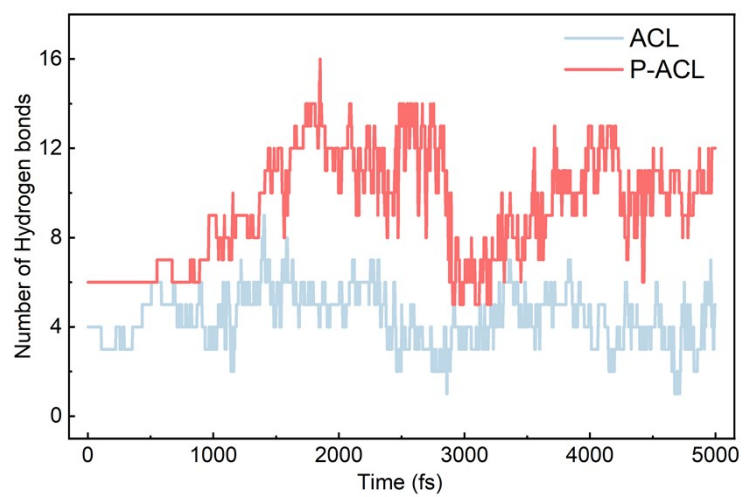

1  
2  
3  
4

**Figure S18.** Number of H-bonds.

1

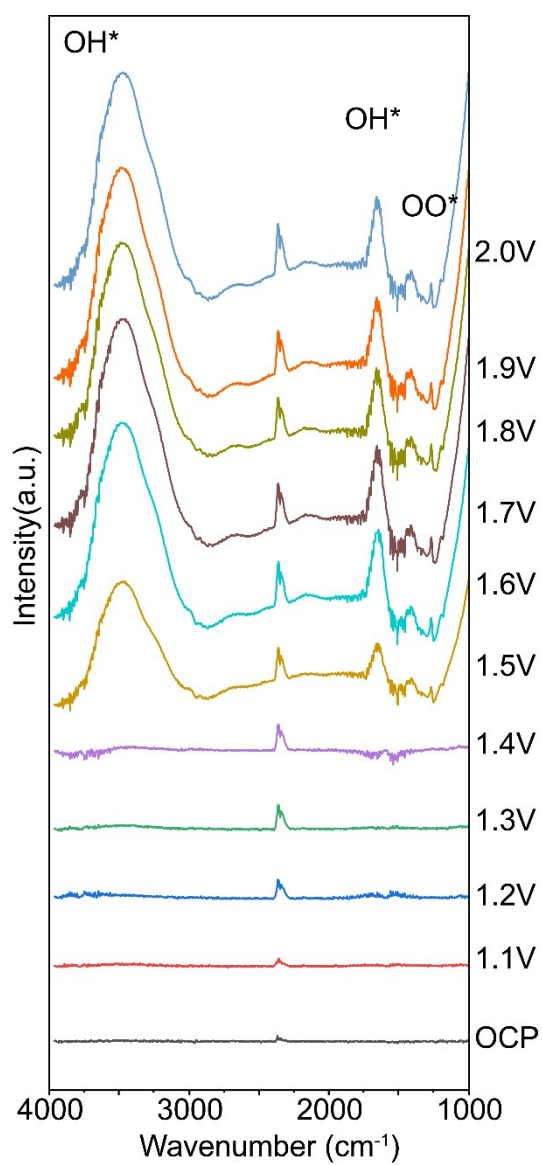

2

3 **Figure S19.** *In situ* ATR-SEIRAS difference spectra of P-ACL collected in 0.5 M  
4 H<sub>2</sub>SO<sub>4</sub> under stepped potentiostatic OER conditions.

5

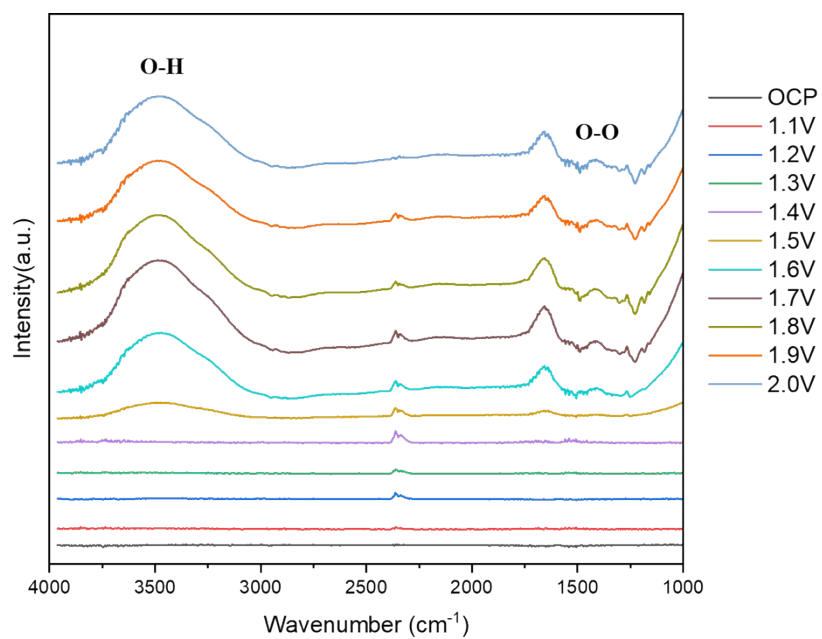

1

2 **Figure S20.** *In situ* ATR-SEIRAS difference spectra of ACL collected in 0.5 M H<sub>2</sub>SO<sub>4</sub>  
3 under stepped potentiostatic OER conditions..

4

5

1

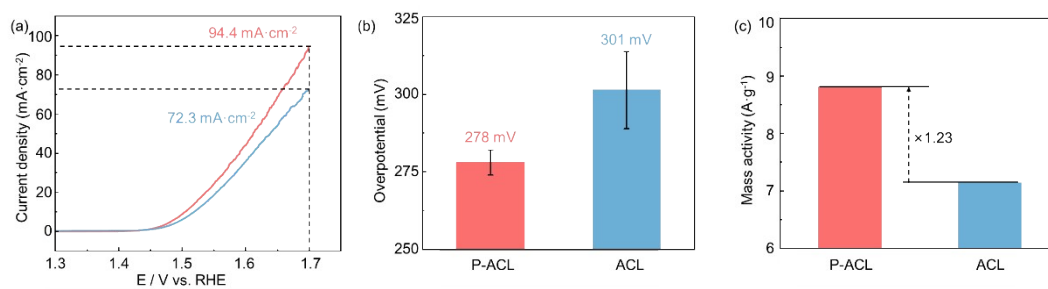

2

3 **Figure S21.** Three-electrode performance and microscopic mechanism of P-ACL and

4 pristine ACL. (a) IR-corrected LSV curves, (b) overpotential at 10 mA·cm<sup>-2</sup>, (c) mass

5 activity.

6

7

1

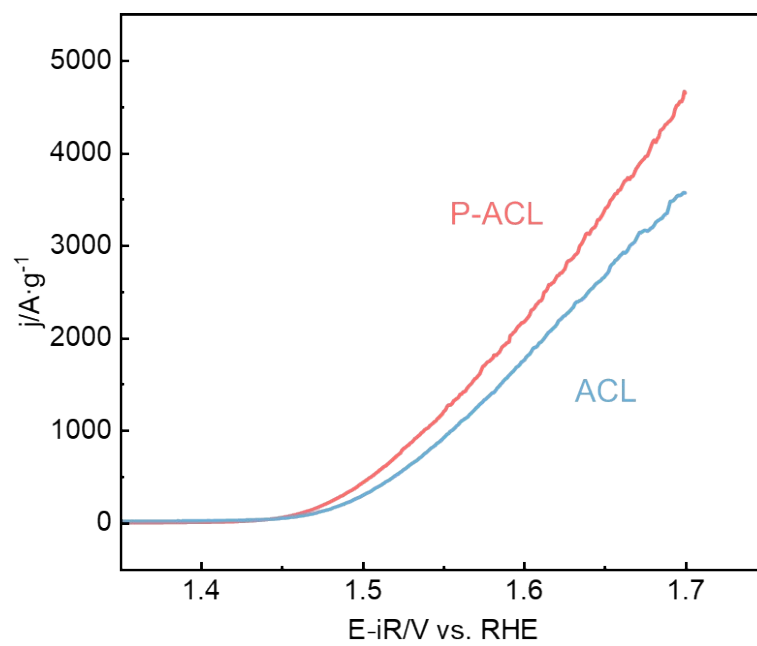

2

3 **Figure S22.** Mass-normalized LSV of ACL and P-ACL.

4

1

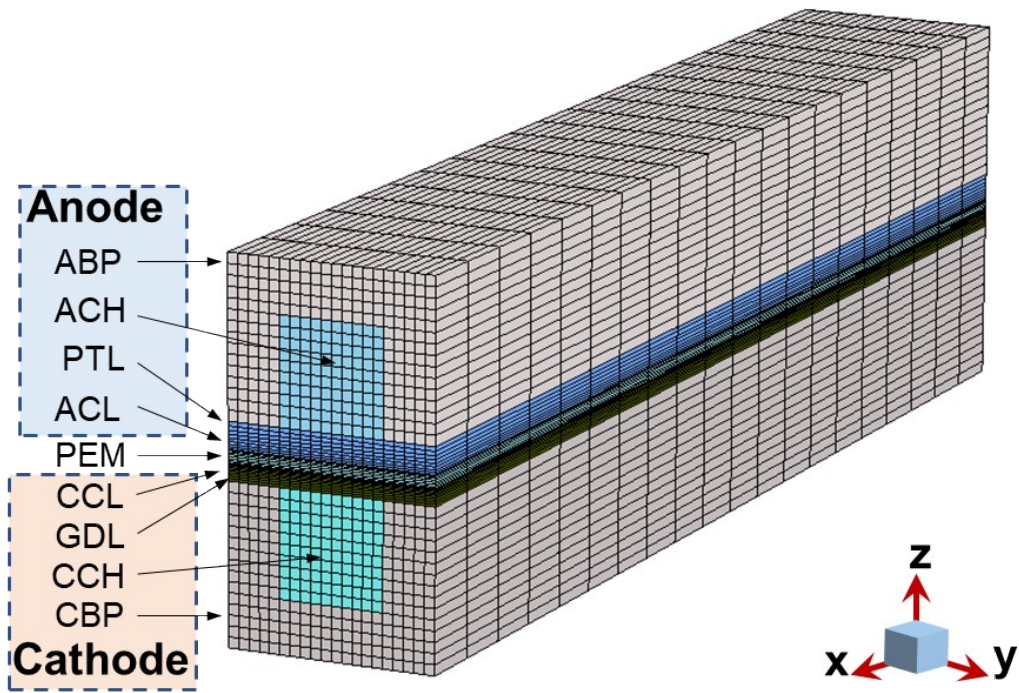

2

3 **Figure S23.** 3D computational domain and mesh.

4

1  
2 The model integrates multiphase flow, electrochemical reactions, and mass  
3 transport with considering the hydrogen crossover. The key structural components  
4 including the proton exchange membrane (PEM), catalytic layers (CLs), porous  
5 transport layer (PTLs), and flow channel (CHs). The model was parameterized and  
6 validated against experimental data (Figure S13). Critical inputs such as the MEA  
7 configuration, catalyst loading, ionomer fraction and ACL thickness were derived from  
8 experimental measurements. A voltage sweeping from 1.2 V to 2.0 V with a 50-mV  
9 increment was simulated. The resulting polarization curve shows good agreement with  
10 experimental data, with the agreement improving at higher current densities. The  
11 maximum discrepancy, observed at the initial low-current stage and likely attributable  
12 to measurement uncertainties under minimal current flow, remains below 10%. The  
13 error falls within 2% for current densities exceeding  $0.5 \text{ A} \cdot \text{cm}^{-2}$ . Further validation was  
14 performed by comparing the simulated and experimental voltage loss contributions  
15 (kinetic, ohmic, and mass transport) at  $2.0 \text{ A} \cdot \text{cm}^{-2}$ , which showed consistent alignment,  
16 confirming the model's reliability (Figure S14), and the detailed data is shown in the  
17 Table S4.

18  
19  
20  
21  
22  
23

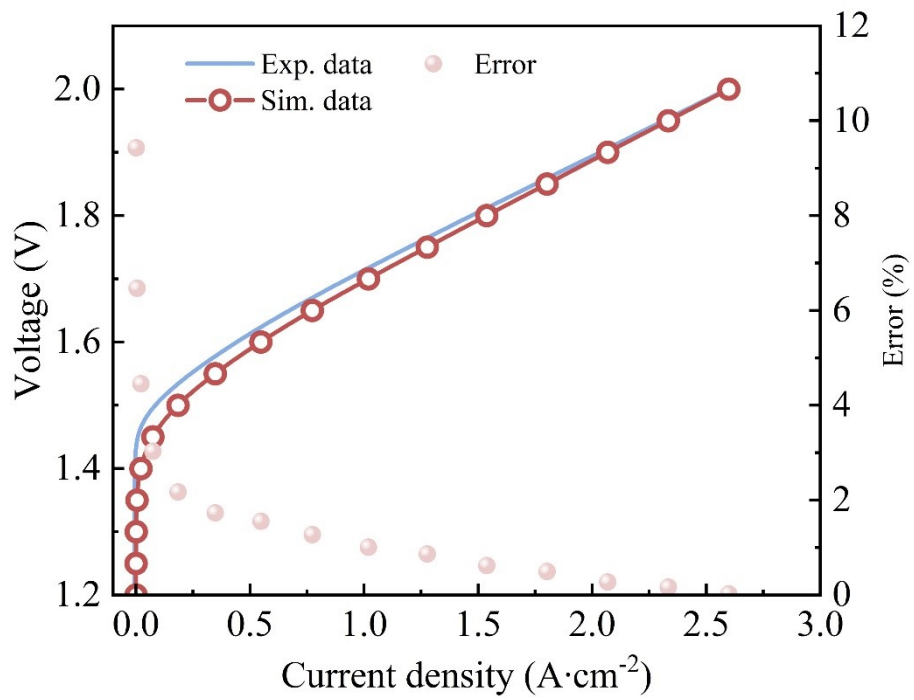

1

2 **Figure S24.** Validation of the PEMWE model through comparison of simulated and  
 3 experimental polarization curves.

4

5

1

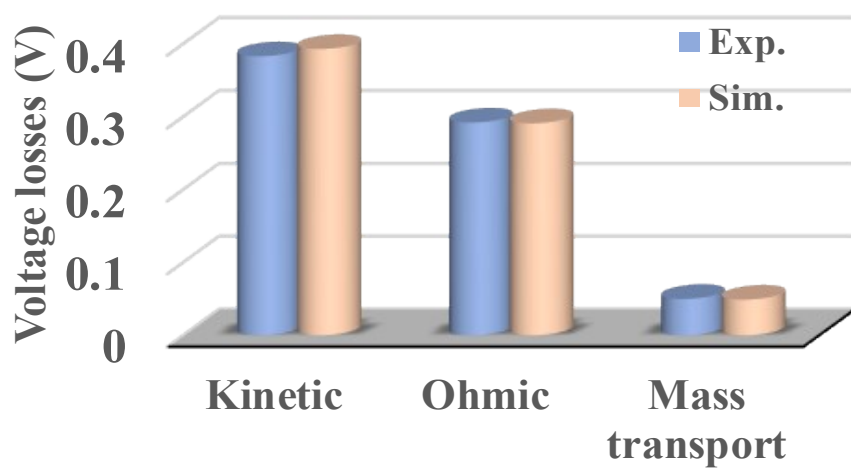

2

3 **Figure S25.** Comparison of voltage loss contributions.

4

5

1

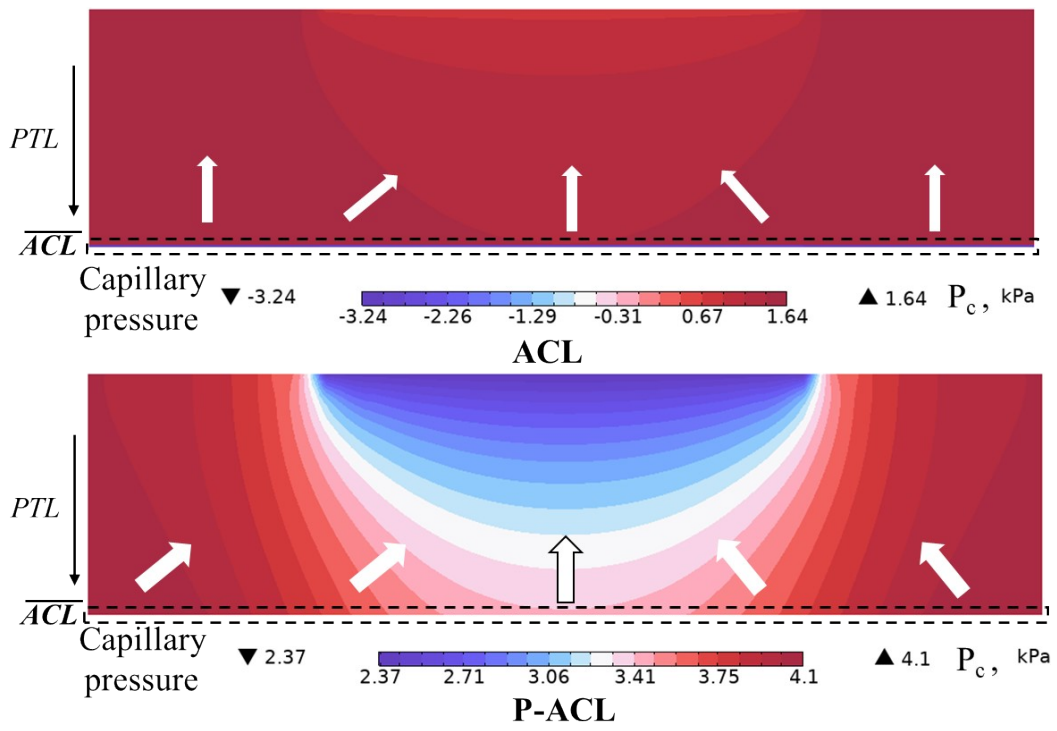

2

3 **Figure S26.** Capillary pressure distribution of ACL and P-ACL.

4

5

1

2 Table S1. Geometry parameters.

| Parameters                                         | Value                                           |
|----------------------------------------------------|-------------------------------------------------|
| Single channel length (mm)                         | 25                                              |
| Single channel width (mm)                          | 1                                               |
| Single channel height (mm)                         | 1                                               |
| Bipolar plate width (mm)                           | 0.5                                             |
| Bipolar plate height (mm)                          | 2                                               |
| PTL thickness ( $\mu\text{m}$ )                    | 250                                             |
| GDL thickness ( $\mu\text{m}$ )                    | 250                                             |
| CLs thickness ( $\mu\text{m}$ )                    | 1.5/5                                           |
| PEM thickness ( $\mu\text{m}$ )                    | 127                                             |
| Cat. Loading ( $\text{mg cm}^{-2}$ )               | 0.5/0.2                                         |
| Mass fraction ion.                                 | 0.143/0.167                                     |
| Transfer coefficient                               | 0.5/0.5                                         |
| PTLs porosity                                      | 0.5                                             |
| Permeability of PTL/CL ( $\text{m}^2$ )            | $1 \times 10^{-12}/1 \times 10^{-13}$           |
| Conductivity of PTLs/CLs/BPs ( $\text{S m}^{-1}$ ) | $1 \times 10^4 / 5 \times 10^3 / 2 \times 10^4$ |
| PTL Contact angle ( $^\circ$ )                     | 80                                              |
| ACL Contact angle ( $^\circ$ )                     | 110                                             |
| P-ACL Contact angle ( $^\circ$ )                   | 70                                              |

3

4

1 Table S2. Boundary and initial conditions.

|                                                 |                                             |
|-------------------------------------------------|---------------------------------------------|
| Fluid transport: mass and momentum conservation |                                             |
| Anode channel inlet                             | $u_a = u_{a,in}$                            |
| Anode/Cathode channel outlet                    | $p_a = p_c = 1 \text{ bar}$                 |
| Species transfer of gas                         |                                             |
| Anode/Cathode channel inlet                     | $c_{0,O_2} = c_{0,H_2} = 0 \text{ mol/m}^3$ |
| Anode/Cathode channel outlet                    | $\vec{n} \cdot D_i \nabla c_i = 0$          |
| Charge transport and conservation               |                                             |
| Anode end plate                                 | $\phi_s = V_0$                              |
| Cathode end plate                               | $\phi_s = 0 \text{ V}$                      |
| Energy conservation                             |                                             |
| Anode channel inlet                             | $T_{a,in} = T_{c,in} = 353.15 \text{ K}$    |
| External walls                                  | $-\vec{n} \cdot q = 0$                      |
| Liquid water saturation conservation            |                                             |
| Anode channel inlet                             | $s_{a,in} = 0.9, s_{c,in} = 0.2$            |
| Anode/Cathode channel outlet                    | $-\vec{n} \cdot D_i \nabla s_i = 0$         |

2

3

1 Table S3. Source terms within each region of the computational domain.

| Source      | PEM        | ACL                                   | CCL                                        | PTL                 |
|-------------|------------|---------------------------------------|--------------------------------------------|---------------------|
| $S_l$       | —          | $\frac{R_a M_{H_2O}}{2F} + S_1$       | $S_{vs} M_{H_2O} - S_{v\lambda} M_{H_2}$   | $S_{vs} M_{H_2O}$   |
| $S_g$       | —          | $\frac{R_a M_{O_2}}{4F} - S_{vs} M_I$ | $\frac{R_c M_{H_2}}{2F} - S_{vs} M_{H_2O}$ | $- S_{vs} M_{H_2O}$ |
| $S_c$       | —          | $\frac{R_a}{4F}$                      | $\frac{R_c}{2F}$                           | 0                   |
| $S_e$       | 0          | $R_a$                                 | $- R_c$                                    | —                   |
| $S_p$       | 0          | $R_a$                                 | $- R_c$                                    | —                   |
| $S_T$       | $S_{T,JH}$ | $S_{T,JH} + S_{T,m}$                  | $S_{T,JH} + S_{T,m}$                       | $S_{T,JH}$          |
| $S_\lambda$ | —          | $S_{v\lambda}$                        | $S_{v\lambda}$                             | —                   |

2

3

1 Table S4. Model variation for voltage losses.

| Voltage losses (V) | Exp.  | Sim.  |
|--------------------|-------|-------|
| Kinetic (V)        | 0.383 | 0.393 |
| Ohmic (V)          | 0.292 | 0.291 |
| Mass transport (V) | 0.05  | 0.049 |

2
